# Supplementary material for: Non-canonical Notch signaling activates IL-6/JAK/STAT signaling in breast tumor cells and is controlled by p53 and IKKα/IKKβ
Source: PubMed Central journal article supplement — Oncogene. 2012 Nov 26;32(41):4892–902. doi: 10.1038/onc.2012.517 (PMC3795477; doi:10.1038/onc.2012.517), 2012-11-26
Supplement: onc2012517x4.pdf [file onc2012517x4.pdf]

| <b>Gene</b> | <b>Chromosome</b> | <b>Start</b> | <b>End</b>  | <b>Distance to gene (bp)</b> |
|-------------|-------------------|--------------|-------------|------------------------------|
| IL6         | chr7              | 22 893 732   | 22 894 417  | 127 309                      |
| SSH1        | chr12             | 109 192 301  | 109 193 009 | 28 672                       |
| LYST        | chr1              | 235 838 188  | 235 838 738 | 191 757                      |
| PGF         | chr14             | 75 419 489   | 75 420 139  | 2 653                        |

### Supplementary Figure 3
