# Supplementary material for: Non-canonical Notch signaling activates IL-6/JAK/STAT signaling in breast tumor cells and is controlled by p53 and IKKα/IKKβ
Source: PubMed Central journal article supplement — Oncogene. 2012 Nov 26;32(41):4892–902. doi: 10.1038/onc.2012.517 (PMC3795477; doi:10.1038/onc.2012.517), 2012-11-26
Supplement: onc2012517x6.pdf [file onc2012517x6.pdf]

### qPCR primers

| Gene                 | Forward primer sequence (5'-3') | Reverse primer sequence (5'-3') |
|----------------------|---------------------------------|---------------------------------|
| <b>Human primers</b> |                                 |                                 |
| IL6                  | AGTGGCTGCAGGACATGACAA           | CAATCT GAGGTGCCCATGCTA          |
| CSL                  | TTGGTGTGTTCCCTCAGCAAGC          | TTGGTGTGTTCCCTCAGCAAGC          |
| $\beta$ -actin       | CCAGAGGCGTACAGGGATAG            | CCAACCGCGAGAAGATGA              |
| IL-6 nascent         | CTGGCGATAACCAATTTTCCC           | ACAGCTCTGGCTTGTTCCTCAC          |
| IL-6 mature          | AAATTCGGTACATCCTCGACG           | GTTGTTTTCTGCCAGTGCCTCT          |
| CAB39L               | AAGGTGTTTGTGGCCAGTCCT           | CGTCCTTTCTTTTTGGAAGCTG          |
| SLC6A12              | CCAAGGCCGATATTGCTAACTG          | GGTTTGC GTTAGAAGCAGGATG         |
| KCNJ8                | TGCAACCTGGCGCATAAGA             | TGGTAAAGATGACCAGCGTGTG          |
| DIXDC1               | AAGCACTCCGAAACTCTCTGA           | CGCCTCATCTGCCTCTCTTTT           |
| SSH1                 | CTGTGCAGGATGGAGTAGGTTG          | CACTGAGTTAATCTGGCGGACC          |
| TIMP3                | TTCCCTGCGGAGTCGATAAA            | TGACATCGCTTTGCGAAAGA            |
| NR2F1                | GCTCTTCTTCGTCCGTTTGGT           | TGGATGGACATGTAAGGCCAG           |
| LYST                 | TCCCGTGCAGCCCTATCACTAT          | GACGCACACCAAATCAAACC            |
| PGF                  | AGGACAGGACCCTCAGGAATTC          | CCACGTGTCTTGCTTCTTTCAA          |
| IKK $\alpha$         | TCACTCCTACAGTGACAGCAC AG        | GCTTACAGCCCAACA ACTTGC TC       |
| IKK $\beta$          | GCTGCCTTATTCTGAATCCCAA          | ACACACGCTTGAGCAGGAATG           |
| IKK $\gamma$         | TGCCCTCTTACCATGCACAC            | GGAATAGCATGCAGCCCAA             |
| P50                  | TCTGGCGCAGAAATTAGGTCTG          | GCTTCGGTGTAGCCCATTGT            |
| P21                  | TGTCCGT CAGAACCCATGC            | AAAGTCGAAGTTCCATCGCTC           |
| <b>Mouse primers</b> |                                 |                                 |
| Notch1               | GCTGAGCATGTACCCGAGC             | ATGACGCTTGAAGAC CACGTT          |
| Jag1                 | AGAAGTCAGAGTTCAGAGGCGTCC        | AGTAGAAGGCTGTCACCAAGCAAC        |
| IL-6                 | CAGAAGGAGTGGCTAAGGACCA          | ACGCACTAGGTTTGCCGAGTAG          |

Supplementary Figure 5
