# Supplementary figures and images for: Non-canonical Notch signaling activates IL-6/JAK/STAT signaling in breast tumor cells and is controlled by p53 and IKKα/IKKβ
Source: PubMed Central journal article supplement — Oncogene. 2012 Nov 26;32(41):4892–902. doi: 10.1038/onc.2012.517 (PMC3795477; doi:10.1038/onc.2012.517), 2012-11-26

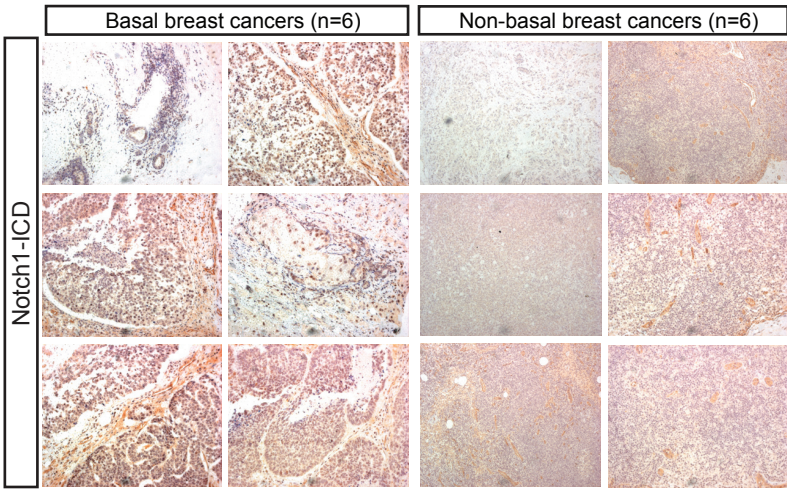

**Supplementary Figure 1**

Supplement: onc2012517x2.pdf [file onc2012517x2.pdf]

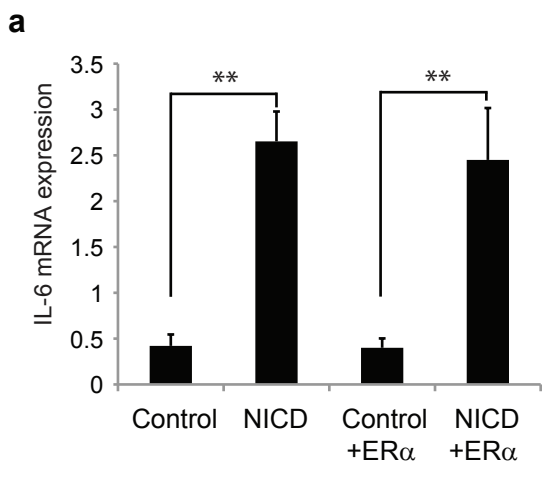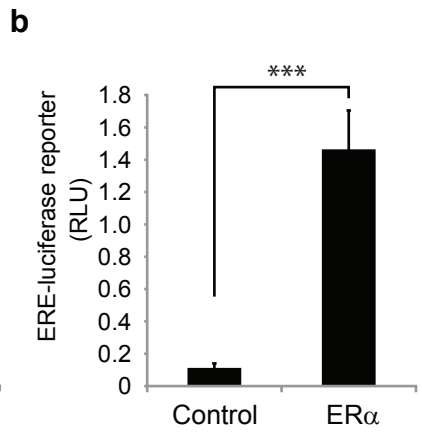

**Supplementary Figure 2**

Supplement: onc2012517x3.pdf [file onc2012517x3.pdf]

**a**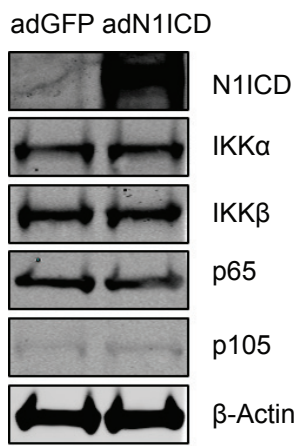**b**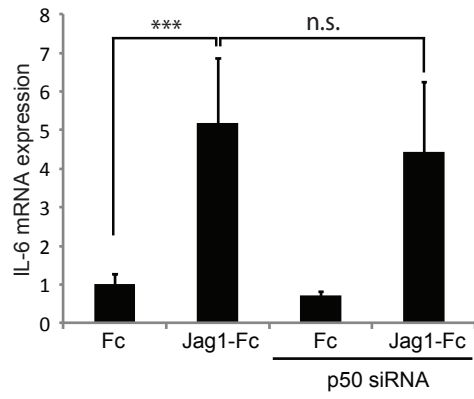**c**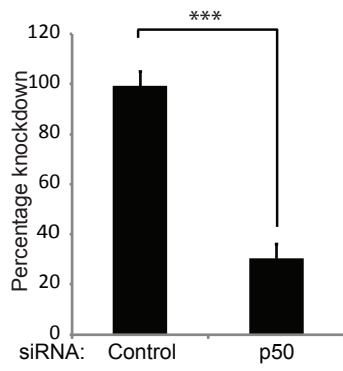

**Supplementary Figure 4**

Supplement: onc2012517x5.pdf [file onc2012517x5.pdf]
